# Supplementary material for: Novel pathogenic mutations and further evidence for clinical relevance of genes and variants causing hearing impairment in Tunisian population
Source: PubMed Central journal article supplement — J Adv Res. 2021 Jan 12;31:13–24. doi: 10.1016/j.jare.2021.01.005 (PMC8240103; doi:10.1016/j.jare.2021.01.005), 2021-01-12

# NON SYNDROMIC HEARING IMPAIRMENT

Family 1 : CIB2-Arg104Ter

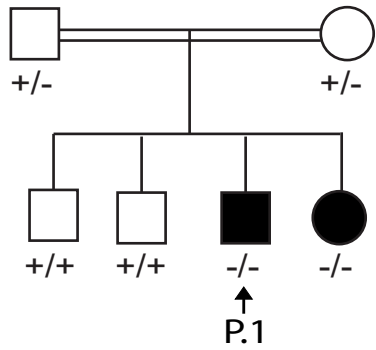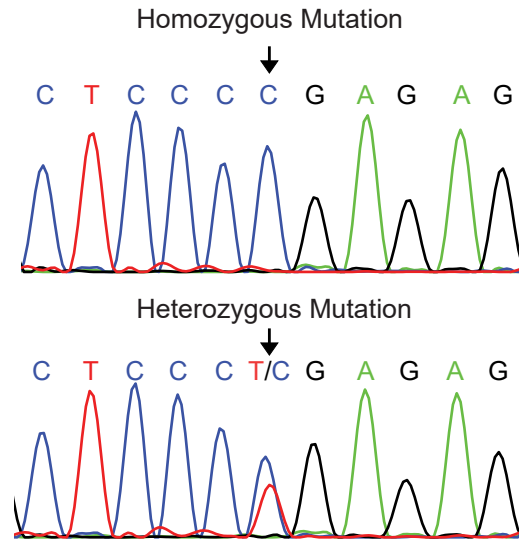

Family 2 : ESRRB-Tyr295Cys

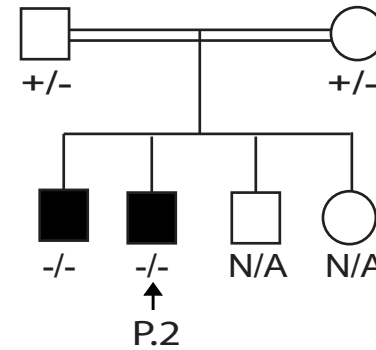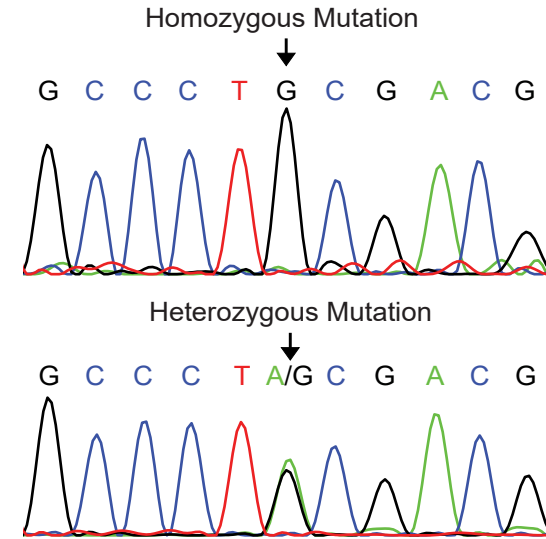

Family 3 : WHRN-Gly808AspfsX11

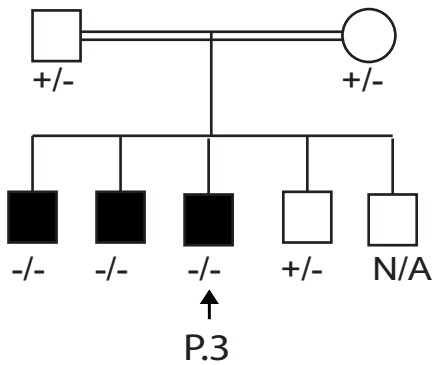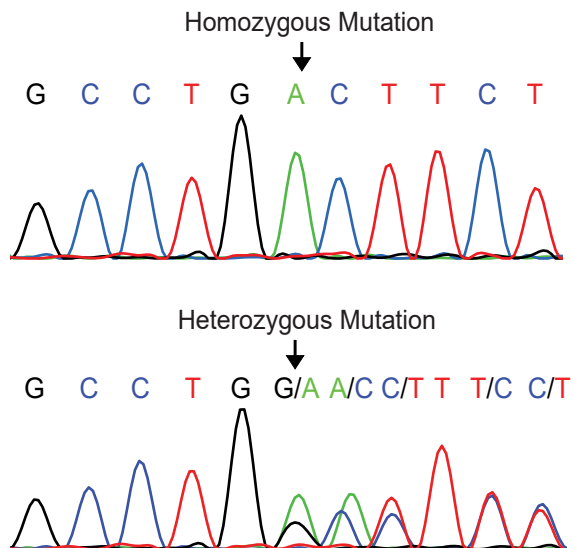

Family 4 : OTOF-Glu57Ter

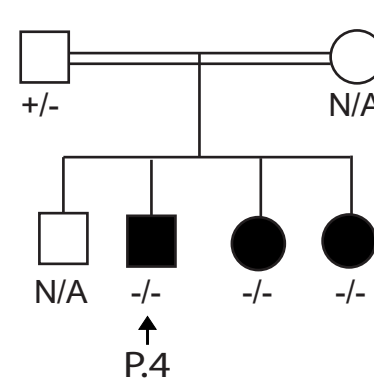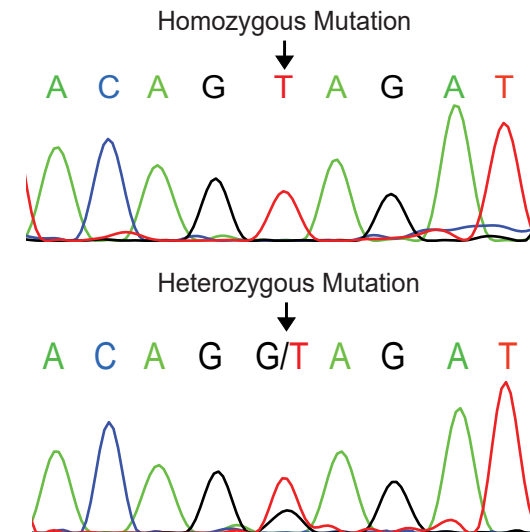

# NON SYNDROMIC HEARING IMPAIRMENT

Family 5 : MYO15A-Phe2089Leu

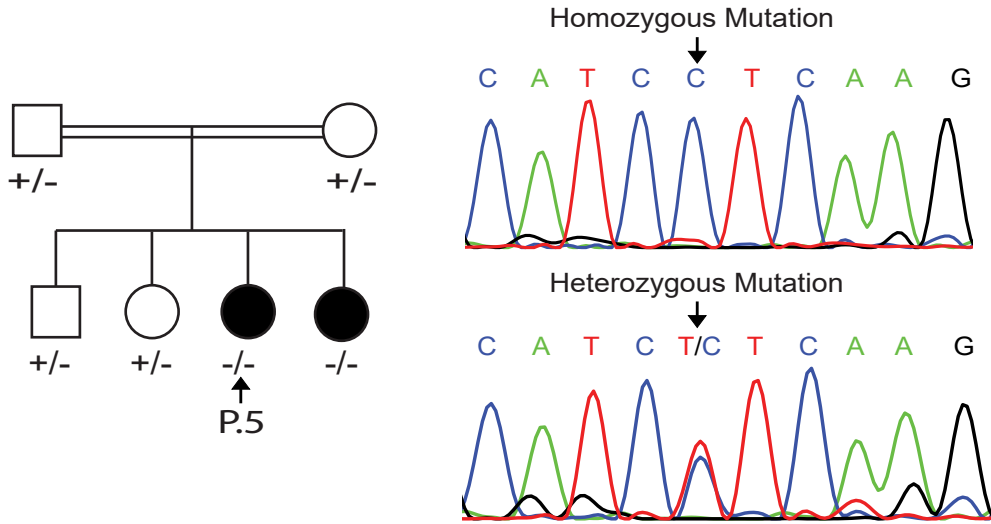

Family 6 : SLC22A4-Cys113Tyr

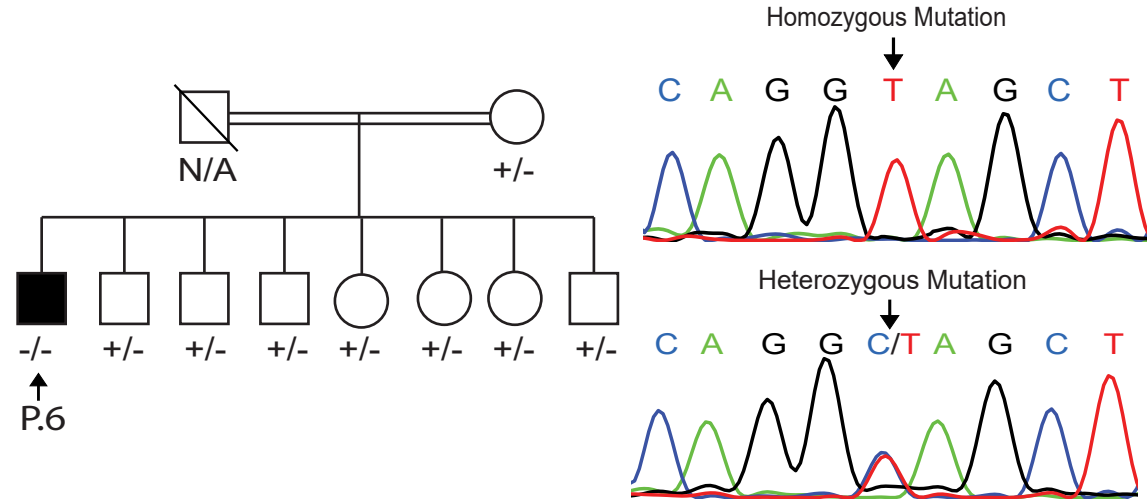

Family 7 : PNPT1-Glu475Gly

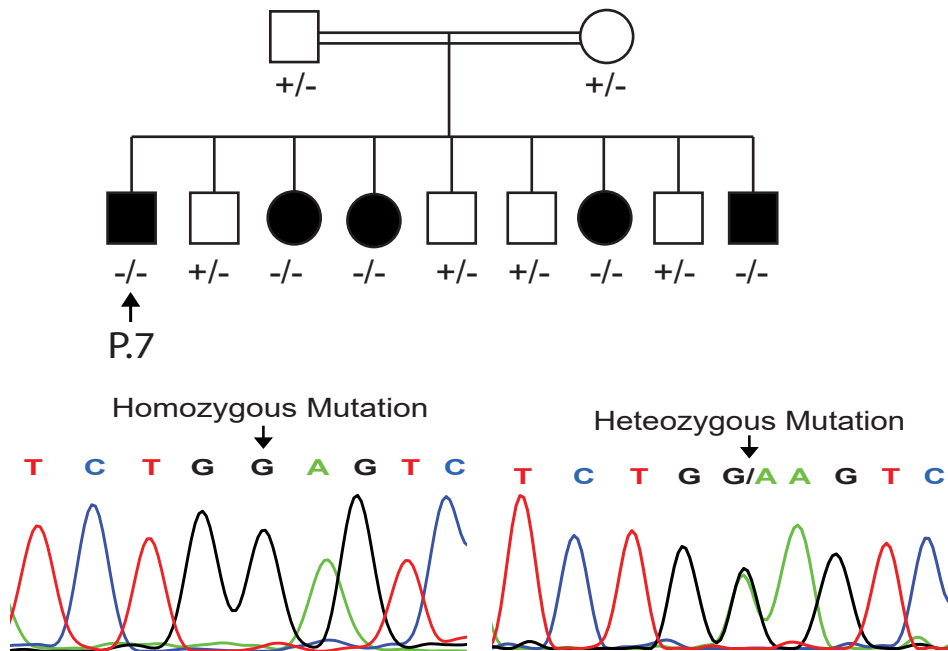

Family 8 : OTOA-Val603Phe

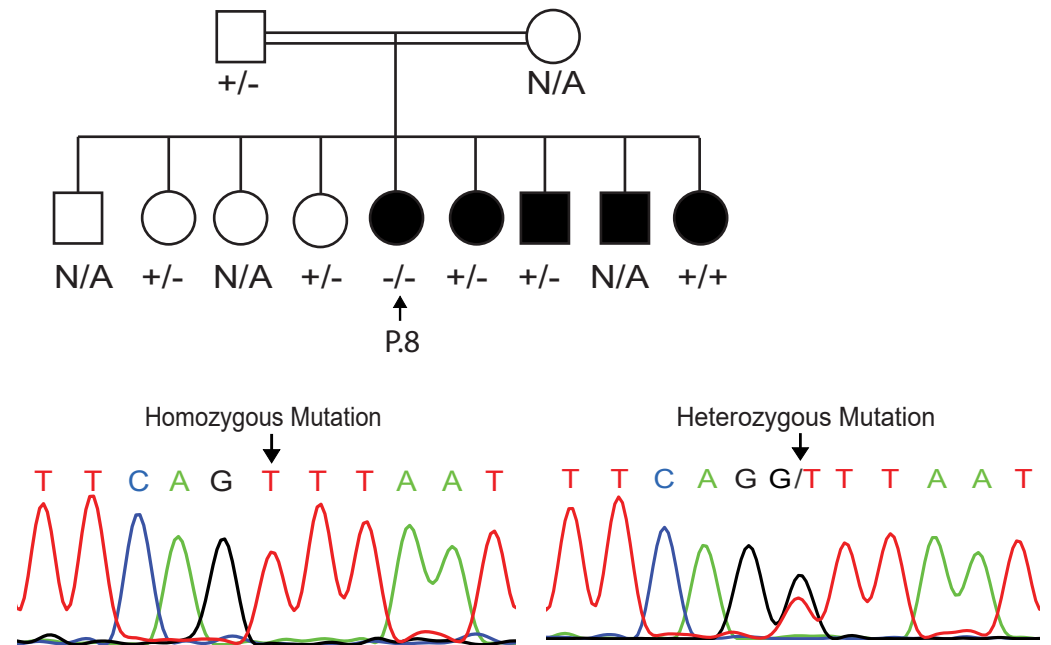

# USHER SYNDROME

**Family 10 : USH1C- Gln122Ter**

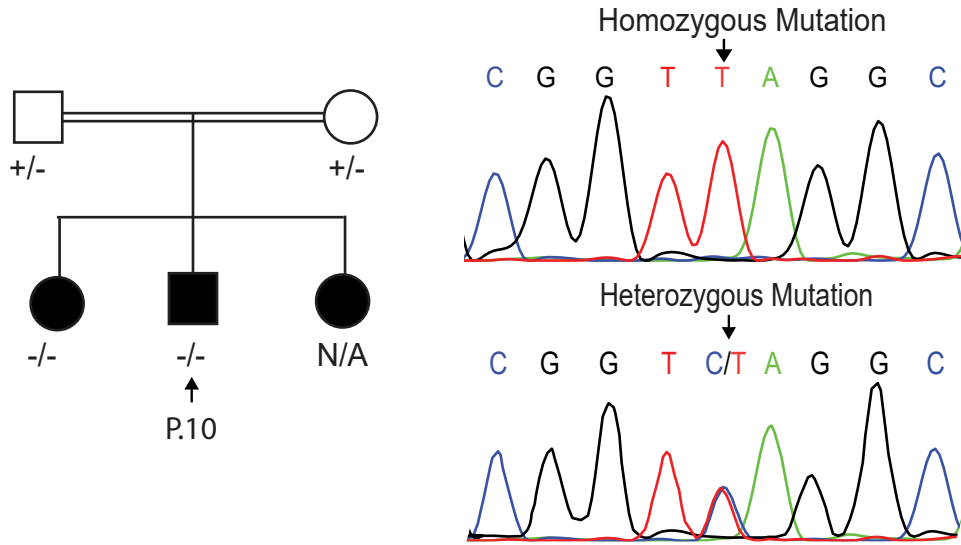

**Family 11 : MYO7A-Tyr560Cys**

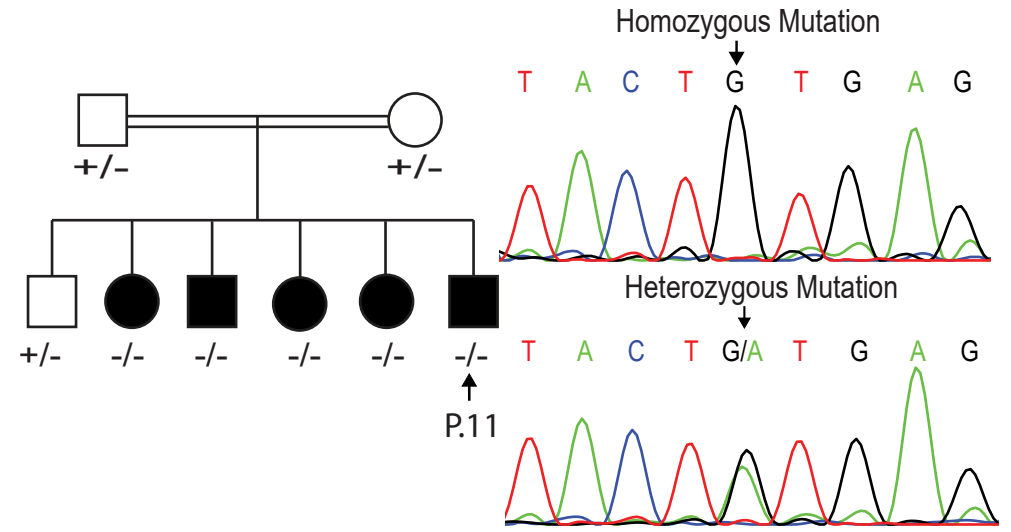

**Family 12 : MYO7A c.470+1G>A  
MYO7A c.2283-1G>T**

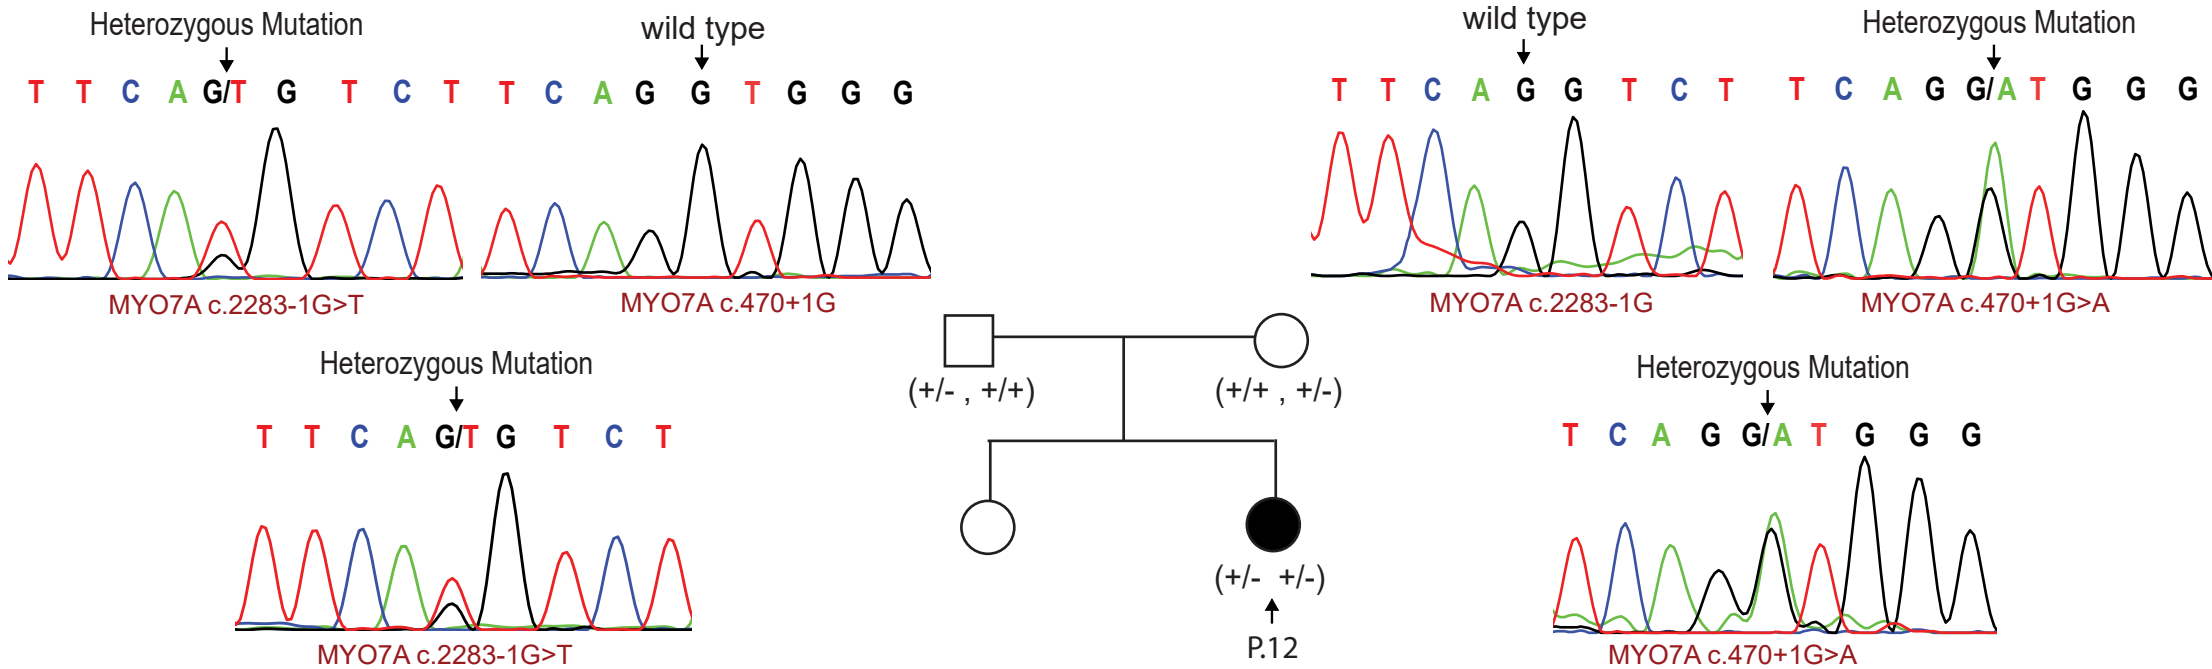

Supplement: mmc1.pdf [file mmc1.pdf]
